# Supplementary material for: Cold Agglutinins and Cryoglobulins Associate With Clinical and Laboratory Parameters of Cold Urticaria
Source: PubMed Central journal article supplement (PMC8117240; doi:10.3389/fimmu.2021.665491), 2021-04-29
Supplement: DataSheet_1.pdf [file DataSheet_1.pdf]

## Supplementary Material

**Supplementary Table 1** Variables linked to cold agglutinins

| Patient no. | Sex | CA test <sup>a</sup> | CA titer <sup>b</sup> | UCT score | Hemoglobin level (g/L) | Erythrocyte count (10 <sup>12</sup> /L) | Monocyte count (10 <sup>9</sup> /L) | Thrombocyte count (10 <sup>9</sup> /L) | Mean daily Temp. (°C) <sup>c</sup> |
|-------------|-----|----------------------|-----------------------|-----------|------------------------|-----------------------------------------|-------------------------------------|----------------------------------------|------------------------------------|
| 1           | F   | Neg                  | 0                     | 13        | 141                    | 4.61                                    | 1.01                                | 340                                    | 0                                  |
| 2           | M   | Pos                  | 1                     | 5         | 137                    | 4.44                                    | 0.38                                | 271                                    | 17                                 |
| 3           | F   | Pos                  | 2                     | 3         | 132                    | 4.51                                    | 0.35                                | 468                                    | 25                                 |
| 4           | M   | Neg                  | 0                     | 16        | 149                    | 4.81                                    | 0.57                                | 236                                    | 18                                 |
| 5           | F   | Pos                  | 4                     | 3         | 146                    | 4.85                                    | 0.50                                | 209                                    | 17                                 |
| 6           | F   | Pos                  | 4                     | 7         | 140                    | 4.24                                    | 0.57                                | 330                                    | 13                                 |
| 7           | M   | Neg                  | 0                     | 11        | 147                    | 4.66                                    | 0.61                                | 257                                    | 15                                 |
| 8           | F   | Pos                  | 1                     | 12        | 138                    | 4.58                                    | 0.37                                | 275                                    | 21                                 |
| 9           | F   | Neg                  | 0                     | 6         | 154                    | 4.80                                    | 0.60                                | 266                                    | 4                                  |
| 10          | M   | Neg                  | 0                     | 16        | 159                    | 4.92                                    | 0.91                                | 237                                    | 16                                 |
| 11          | F   | Pos                  | 2                     | 12        | 146                    | 4.74                                    | 0.64                                | 318                                    | 21                                 |
| 12          | F   | Pos                  | 4                     | 14        | 139                    | 4.32                                    | 0.41                                | 203                                    | 22                                 |
| 13          | M   | Neg                  | 0                     | 9         | 154                    | 5.22                                    | 0.50                                | 371                                    | 21                                 |
| 14          | F   | Pos                  | 1                     | 7         | 130                    | 4.02                                    | 0.05                                | 301                                    | 18                                 |
| 15          | F   | Neg                  | 0                     | 6         | 130                    | 4.19                                    | 0.79                                | 272                                    | 2                                  |
| 16          | M   | Pos                  | 2                     | 13        | 143                    | 4.99                                    | 0.71                                | 365                                    | 21                                 |
| 17          | M   | Neg                  | 0                     | 15        | 150                    | 5.13                                    | 0.61                                | 282                                    | 6                                  |
| 18          | M   | Neg                  | 0                     | 16        | 159                    | 5.43                                    | 0.56                                | 259                                    | 17                                 |
| 19          | F   | Neg                  | 0                     | 15        | 135                    | 4.37                                    | 0.69                                | 269                                    | 15                                 |
| 20          | F   | Pos                  | 2                     | 9         | 134                    | 4.17                                    | 0.58                                | 292                                    | 13                                 |
| 21          | F   | Pos                  | 4                     | 11        | 120                    | 4.27                                    | 0.20                                | 274                                    | 22                                 |
| 22          | F   | Neg                  | 0                     | 16        | 145                    | 4.42                                    | 0.69                                | 222                                    | 2                                  |
| 23          | F   | Pos                  | 16                    | 12        | 145                    | 5.06                                    | 0.37                                | 335                                    | 10                                 |
| 24          | F   | Neg                  | 0                     | 14        | 151                    | 4.73                                    | 0.53                                | 170                                    | 2                                  |
| 25          | F   | Neg                  | 0                     | 10        | 146                    | 4.76                                    | 0.38                                | 197                                    | 10                                 |
| 26          | F   | Neg                  | 0                     | 16        | 142                    | 4.43                                    | 0.53                                | 220                                    | 13                                 |
| 27          | M   | Neg                  | 0                     | 16        | 162                    | 6.02                                    | 0.53                                | 150                                    | 8                                  |
| 28          | F   | Pos                  | 1                     | 12        | 134                    | 4.69                                    | 0.40                                | 285                                    | 0                                  |
| 29          | F   | Pos                  | 2                     | 7         | 123                    | 4.44                                    | 0.33                                | 248                                    | 10                                 |
| 30          | M   | Neg                  | 0                     | 13        | 146                    | 4.98                                    | 0.35                                | 208                                    | 13                                 |
| 31          | F   | Pos                  | 2                     | 10        | 128                    | 3.98                                    | 0.33                                | 228                                    | 13                                 |
| 32          | M   | Neg                  | 0                     | 13        | 149                    | 4.90                                    | 0.41                                | 222                                    | 7                                  |
| 33          | M   | Neg                  | 0                     | 5         | 161                    | 5.27                                    | 0.47                                | 271                                    | 5                                  |
| 34          | F   | Pos                  | 1                     | 11        | 137                    | 4.22                                    | 0.30                                | 222                                    | 7                                  |
| 35          | F   | Neg                  | 0                     | 4         | 139                    | 4.69                                    | 0.52                                | 233                                    | 2                                  |

<sup>a</sup>Cold agglutinin test performed at 4°C. <sup>b</sup>The numbers are inverse of the maximum serum dilution at which agglutination can be seen (i.e., CA titer 4 = agglutination at 1:4 dilution). <sup>c</sup>Mean daily temperature on the day when blood was drawn was obtained from the national weather service website (<http://meteo.arso.gov.si/met/en/>). *Abbreviations:* CA, cold agglutinin; F, female; M, male; Neg, negative; Pos, positive; Temp., temperature; UCT, Urticaria Control Test.

**Supplementary Table 2** Variables linked to cryoglobulins

| Patient no. | CG test | CG conc. (mg/L) | CG Ig isotype(s) | ColdU duration (months) | Lymphocyte count (10 <sup>9</sup> /L) | Basal serum tryptase level (ng/mL) |
|-------------|---------|-----------------|------------------|-------------------------|---------------------------------------|------------------------------------|
| 1           | Pos     | 137             | IgG, IgM, IgA    | 70                      | 2.13                                  | 3.66                               |
| 2           | Neg     | —               | —                | 14                      | 1.55                                  | 3.24                               |
| 3           | Neg     | —               | —                | 24                      | 2.58                                  | 3.41                               |
| 4           | Neg     | —               | —                | 60                      | 2.49                                  | 11.60                              |
| 5           | Neg     | —               | —                | 336                     | 1.39                                  | 8.15                               |
| 6           | Neg     | —               | —                | 9                       | 1.22                                  | 15.90                              |
| 7           | Neg     | —               | —                | 4                       | 1.94                                  | 5.34                               |
| 8           | Neg     | —               | —                | 50                      | 1.63                                  | 5.32                               |
| 9           | Pos     | 189             | IgG              | 169                     | 2.89                                  | 7.57                               |
| 10          | Neg     | —               | —                | 120                     | 1.52                                  | 6.19                               |
| 11          | Neg     | —               | —                | 228                     | 2.49                                  | 23.00                              |
| 12          | Neg     | —               | —                | 156                     | 2.68                                  | 3.57                               |
| 13          | Neg     | —               | —                | 60                      | 2.44                                  | ND                                 |
| 14          | Neg     | —               | —                | 99                      | 1.94                                  | 5.35                               |
| 15          | Pos     | 124             | IgG, IgM         | 24                      | 1.88                                  | 3.83                               |
| 16          | Neg     | —               | —                | 24                      | 1.40                                  | 5.50                               |
| 17          | Neg     | —               | —                | 240                     | 1.99                                  | 7.79                               |
| 18          | Neg     | —               | —                | 10                      | 1.34                                  | 4.44                               |
| 19          | Pos     | 184             | IgG, IgM         | 252                     | 2.67                                  | 13.60                              |
| 20          | Neg     | —               | —                | 276                     | 1.70                                  | 5.49                               |
| 21          | Neg     | —               | —                | 72                      | 1.20                                  | 3.96                               |
| 22          | Neg     | —               | —                | 120                     | 2.61                                  | 6.37                               |
| 23          | Pos     | 153             | IgG, IgM, IgA    | 216                     | 2.62                                  | 5.55                               |
| 24          | Neg     | —               | —                | 384                     | 1.80                                  | 7.41                               |
| 25          | Neg     | —               | —                | 2                       | 1.13                                  | 6.00                               |
| 26          | Neg     | —               | —                | 22                      | 2.06                                  | 4.55                               |
| 27          | Neg     | —               | —                | 15                      | 2.01                                  | 12.70                              |
| 28          | Pos     | 187             | IgG, IgM         | 84                      | 1.72                                  | 6.09                               |
| 29          | Neg     | —               | —                | 8                       | 1.75                                  | 3.05                               |
| 30          | Pos     | 106             | IgG, IgM         | 60                      | 1.22                                  | 2.92                               |
| 31          | Neg     | —               | —                | 42                      | 1.95                                  | 5.10                               |
| 32          | ND      | —               | —                | 8                       | 1.47                                  | 2.90                               |
| 33          | Pos     | 138             | IgG, IgM         | 72                      | 1.49                                  | 6.06                               |
| 34          | ND      | —               | —                | 22                      | 2.17                                  | 5.33                               |
| 35          | Pos     | 150             | IgG              | 11                      | 2.12                                  | 14.00                              |

*Abbreviations:* conc., concentration; CG(s), cryoglobulin(s); CRP, C-reactive protein; Ig, immunoglobulin; IgA, immunoglobulin A; IgG, immunoglobulin G; IgM, immunoglobulin M; Neg, negative; ND, not done/determined; Pos, positive.

**Supplementary Table 3** Characteristics of patients with a positive vs. negative cryoglobulin test

| Parameter                                           | CG test               |                       |                      | P value<br>(positive vs.<br>negative) |
|-----------------------------------------------------|-----------------------|-----------------------|----------------------|---------------------------------------|
|                                                     | Total<br>N = 33       | Negative<br>N = 24    | Positive<br>N = 9    |                                       |
| Female sex                                          | 22 (67)               | 15 (63)               | 7 (78)               | 0.681                                 |
| Triggers                                            |                       |                       |                      |                                       |
| Cold ambient air                                    | 27 (82)               | 20 (83)               | 7 (78)               | 1.000                                 |
| Immersion in < 25°C water                           | 18 (55)               | 13 (54)               | 5 (56)               | 0.627                                 |
| Higher summer humidity levels                       | 15 (46)               | 11 (46)               | 4 (44)               | 1.000                                 |
| Ingestion of cold foods/drinks                      | 18 (55)               | 14 (58)               | 4 (44)               | 0.697                                 |
| UCT score                                           | 12 (7–15)             | 12 (8–16)             | 12 (6–13)            | 0.310                                 |
| CST results                                         |                       |                       |                      |                                       |
| Positive ice cube test                              | 20 (61)               | 16 (67)               | 4 (44)               | 0.425                                 |
| Positive TempTest®                                  | 12 (36)               | 11 (46)               | 1 (11)               | 0.107                                 |
| CSTT (s)                                            | 240 (30–300); N = 18  | 150 (30–300); N = 14  | 300 (165–300); N = 4 | 0.182                                 |
| CTT (°C)                                            | 19 (15–25); N = 12    | 21 (16–25); N = 11    | 14; N = 1            | 0.242                                 |
| Laboratory findings                                 |                       |                       |                      |                                       |
| Erythrocyte count (10 <sup>12</sup> /L)             | 4.7 ± 0.4             | 4.7 ± 0.5             | 4.7 ± 0.3            | 0.685                                 |
| Hemoglobin concentration (g/L)                      | 142.6 ± 10.6          | 142.5 ± 11.0          | 142.8 ± 10.0         | 0.948                                 |
| Hematocrit level (%)                                | 41.7 ± 3.4            | 41.6 ± 3.4            | 41.9 ± 3.5           | 0.828                                 |
| Thrombocyte count (10 <sup>9</sup> /L)              | 268.6 ± 63.2          | 266.0 ± 70.1          | 275.4 ± 42.3         | 0.708                                 |
| Monocyte count (10 <sup>9</sup> /L)                 | 0.5 ± 0.2             | 0.5 ± 0.2             | 0.6 ± 0.2            | 0.266                                 |
| Leukocyte count (10 <sup>9</sup> /L)                | 7.0 ± 1.6             | 6.8 ± 1.5             | 7.5 ± 2.0            | 0.269                                 |
| Neutrophil count (10 <sup>9</sup> /L)               | 4.3 ± 1.2             | 4.2 ± 1.2             | 4.4 ± 1.5            | 0.639                                 |
| Lymphocyte count (10 <sup>9</sup> /L)               | 1.9 ± 0.5             | 1.9 ± 0.5             | 2.1 ± 0.6            | 0.285                                 |
| Eosinophil count (10 <sup>9</sup> /L)               | 0.2 ± 0.3             | 0.2 ± 0.1             | 0.3 ± 0.4            | 0.329                                 |
| Basophil count (10 <sup>9</sup> /L)                 | 0.04 ± 0.03           | 0.04 ± 0.03           | 0.05 ± 0.02          | 0.094                                 |
| CRP (mg/L)                                          | 1.7 (0.5–3.5)         | 1.5 (0.6–3.5)         | 2.0 (0.5–4.8)        | 0.984                                 |
| Basal serum tryptase (ng/mL)                        | 5.5 (4.1–7.7); N = 32 | 5.5 (4.4–7.8); N = 23 | 6.1 (3.7–10.6)       | 0.850                                 |
| Total IgE (IU/mL)                                   | 113 (47–232); N = 29  | 94 (30–232); N = 21   | 143 (62–1101); N = 8 | 0.341                                 |
| Mean daily Temp. on the day when<br>blood was drawn | 11.1 ± 7.6            | 12.4 ± 6.6            | 6.9 ± 9.4            | 0.077                                 |

Data are given as no. (%), mean ± SD, and median (IQR). If data was not obtained in all patients, patient numbers are displayed as “N” next to results. Statistical significance of differences between patient groups was calculated by Fisher’s Exact test, Mann-Whitney U test, and Independent-samples T test. No statistically significant P values were found. *Abbreviations:* CG, cryoglobulin; ColdU, cold urticaria; CR(s), cold-induced reaction(s); CRP, C-reactive protein; CST, cold stimulation test; CSTT, critical stimulation time threshold; CTT, critical temperature threshold; IQR, interquartile range; N, number of patients; s, second; SD, standard deviation; UCT, Urticaria Control Test.
